# Supplementary material for: A flexible silver-nanoparticle/polyacrylonitrile biomimetic strain sensor by patterned UV reduction for artificial intelligence flexible electronics
Source: Royal Society of Chemistry journal article supplement (doi:10.1039/d4ta00276h), 2024-01-01
Supplement: d4ta00276h1.pdf [file d4ta00276h1.pdf]

1 **Supplementary Information**

2 **A flexible silver-nanoparticle/polyacrylonitrile biomimetic**  
3 **strain sensor by patterned UV reduction for artificial**  
4 **intelligence flexible electronics**

5 Jiaxiang Lu<sup>1</sup>, Liang Su<sup>1</sup>, Zhili Zhang<sup>2</sup>, Wei Song<sup>1</sup>, Shuang Hu<sup>1</sup>, Jinbo Wang<sup>1</sup>, Xilin Li<sup>1</sup>,  
6 Yiping Huang<sup>1</sup>, Zhaofeng He<sup>2</sup>, Ming Lei<sup>3\*</sup>, Sen Lin<sup>1,4\*</sup>

7 <sup>1</sup>School of Physical Science and Technology, Guangxi University, Nanning 530004,  
8 China.

9 <sup>2</sup>School of Artificial Intelligence, Beijing University of Posts and Telecommunications,  
10 Beijing 100876, China

11 <sup>3</sup>School of Integrated Circuits, Beijing University of Posts and Telecommunications,  
12 Beijing 100876, China

13 <sup>4</sup>Advanced Institute for Brain and Intelligence, Guangxi University, Nanning 530004,  
14 China.

15

16

17 **This file includes:**

18 Supplementary Methods

19 Supplementary Fig. S1-S30

20 Supplementary Table S1

21 Supplementary Video S1-S3

22 Supplementary References 1-9

1

## 2 **Supplementary Methods**

### 3 **Materials and chemicals**

4 Polyacrylonitrile (PAN, Mw=150 000), N,N-Dimethylformamide (DMF, >99.8%)  
5 were purchased from Shanghai Macklin Bio-Chem Technology Co. Ltd. Silver nitrate  
6 ( $\text{AgNO}_3$ ) was purchased from Sinopharm Chemical Reagent Co., Ltd. Styrene Ethylene  
7 Butylene Styrene (SEBS) and Tetrahydrofuran (THF, >99%) were purchased from  
8 Shanghai Aladdin Bio-Chem Technology Co. Ltd. All reagents were used without  
9 further purification.

### 10 **Preparation of the SPBSS**

11 The precursor solution was prepared via the following procedures. First, 0.5g PAN  
12 was dissolved in 6g DMF and magnetically stirred at 70° C for 1 h. 3g  $\text{AgNO}_3$  was add  
13 to the PAN solution. The mixed solution was magnetically stirred at ambient  
14 temperature for at least 2 h magnetically, yielding faint yellow transparent solution for  
15 preparing SPBSS.

16 The precursor solution was cast into the heat-resistant square container uniformly  
17 (The area of the square container is 3cm×3cm), and turn on the ultraviolet lamp and  
18 preheat for at least 15min to ensure sufficient reaction brightness (>235000 lux). The  
19 square container was placed under the ultraviolet lamp for 5min. The sample with  
20 different patterns and scales can be obtained by putting the mask plates on container.  
21 Finally, the square container with the SPBSS was taken out, and the SPBSS can be  
22 taken after cooled at ambient temperature. The SPBSS can be cut as required as

1 possible.

## 2 **Preparation of the SEBS fiber film**

3 First, SEBS was dispersed in THF at a ratio of 1:7 and stirred for 1 h at ambient  
4 temperature. Then, the solution was loaded into a 1 mL syringe with a needle. During  
5 electrospinning, the injection speed of the solution was kept at a value of 2.0 mL h<sup>-1</sup>  
6 and positive 12KV voltage was applied to the needle. The SEBS fiber film was  
7 collected using a metal plate which was applied negative 5KV voltage.

## 8 **Characterization**

9 The stress analysis and electric field distribution of SPBSS was described and  
10 calculated by COMSL Multiphysics 6.0 (Physical Simulation, Sweden). Mechanical  
11 strain tests were conducted using a flexible electronics tester (Shanghai Prtronic Co.,  
12 Ltd, China) and an electrochemical workstation (shanghai CH Instruments Co., Ltd,  
13 China). The loading and unloading rate were set to 60 mm min<sup>-1</sup> and the apply voltage  
14 was set to 0.1 V during strain- $R_{rc}$  test. The loading and unloading rate were set to 15.7  
15 mm min<sup>-1</sup> and the apply voltage was set to 0.1 V during cyclic stretch fatigue tests. The  
16 microscopic morphologies of the SPBSS were examined using a field emission  
17 scanning electron microscope and Energy-dispersive X-ray spectroscopy (EDS) (FE-  
18 SEM, LEO-1530, Zeiss, Germany). The thickness and the scale of silver-nanoparticle  
19 was obtained by analyzing surface of SPBSS in the SEM images using ImageJ software  
20 (Media Cybernetics, USA). The observation of the SPBSS with different strain was  
21 presented using an optical microscope (Olympus Co., Ltd, Japan). X-ray diffraction  
22 (XRD) patterns from the samples were recorded with an X-ray diffractometer (D/max-

1 2500/PC, Rigaku, Japan) equipped with Cu K $\alpha$  radiation ( $\lambda = 1.54178 \text{ \AA}$ ) with  $2\theta$   
2 ranging from  $10^\circ$  to  $90^\circ$ . The elemental composition of the SPBSS was analyzed with  
3 an X-ray photoelectron spectrometer (XPS, Escalab Xi+, Thermo Fisher, USA)  
4 equipped with an Al K $\alpha$  excitation source. Mechanics test was carried out by a  
5 microcomputer controlled electronic universal testing machine (C42.503, China). Sheet  
6 resistance of SPBSS is measured by a sheet resistance tester (HPS2524, China). The  
7 multi-channel signal acquisition was calculated and recorded by Arduino platform, and  
8 the Interface Controller & CPU was ATmega328.

9

## 10 **Micromorphological and chemical analysis**

11 XPS analysis of the products after reaction can provide information on the elements  
12 and chemical bonds of the final products. As show in Fig. S9, the fitting results of the  
13 characteristic peaks of XPS excited by the Ag3d orbitals give two characteristic peaks  
14 which is a typical gap of 6 eV for metallic silver<sup>1</sup>. In the fitting results of C1s XPS  
15 characteristic peaks, binding energy 284.8eV, 286.6 eV and 285.9 eV show C-C, C-C  
16 and C-N characteristic peak of functional group vibration which prove the sample of  
17 SPBSS still existence PAN framework<sup>2</sup>.

## 18 **Model fitting and simulation**

### 19 *Island-bridge model*

20 In island-bridge model (Fig. 2d),  $R_1$  is a constant and  $R_c$  is proportional to strain.  
21 At high strain situation we got  $R_2 \gg R_1$  and  $R_c$ , therefore, equation (3) can be re-written  
22 as below:

1  $R = 2R_1 + R_c$  (S1)

2 where  $R_1$  is found to be 3.775  $\Omega$  according to experimental data, and

3  $R_c(\Omega) = 30.77(\Omega/\%) \times strain(\%)$ .

4 *Optical microscopy experiment*

5 After shaping the sample, fix it in the 3D printed mold. The size of the sample in  
6 test is 22mm \* 10mm, and the 3D printed mold has a scale with the accuracy of 0.5mm.  
7 The stretching mold and sample was placed under the optical microscope, and mark a  
8 certain area in surface with a marking pen. Take the optical image of marking area in  
9 the unstretched state through the optical microscope. And then take out the mold, stretch  
10 the sample which the distance of each stretch is 1mm. Repeat the operation and take  
11 the optical images of different strain.

12 *Simulation on COMSOL Multiphysics*

13 All simulations on COMSOL Multiphysics were performed on steady-state. For  
14 stress concentration effect simulation, the model was set as a cube (1.00\*0.80\*0.50  
15 mm) with two narrow grooves (0.02\*0.60\*0.50 mm) respectively on 1/3 and 2/3 of the  
16 long side (x-axis) (Supplementary Fig. S1). Material of the model was set as Skin. Two  
17 boundary conditions of solid mechanics interface include fixed constraint and  
18 prescribed displacement were respectively added on two x-y boundary surfaces of the  
19 model, forming effective strain from 0.1% to 0.3%. Finally, x-z cross-section colored  
20 stress patterns were outputted for stress analysis.

21 For electric potential and electric field analysis, we built five different model based  
22 on optical microscope images of SPBSS on different strain conditions, the model size

1 followed the real size of each sample (Supplementary Fig. S11). Material of the model  
 2 was set as metallic silver with a thickness of 7  $\mu\text{m}$ . Three hypothetical equations were  
 3 included in this steady-state research:

$$4 \quad \nabla \cdot J = Q_{j,V} \quad (S2)$$

$$5 \quad J = \sigma E + J_e \quad (S3)$$

$$6 \quad E = -\nabla V \quad (S4)$$

7 In this section, 0.1 V terminal electric potential ( $U_T$ ) was applied between two y-z  
 8 boundary surfaces, terminal current ( $I_T$ ), electric potential and field distribution on x-y  
 9 surface for each model were outputted and analyzed.

#### 10 **Triangulation location**

11 For triangulation location, three SPBSS are placed on the vertexes of an equilateral  
 12 triangle with a distance of  $L$ . As mentioned in main text,  $R_{rc}$  of SPBSS decays  
 13 exponentially with the distance from vibration source as equation (5) according to one-  
 14 dimensional vibration experiment, wherein, fitting parameters  $A$  and  $\beta$  are 18.72 and  
 15 4.32, respectively. Therefore, the equation can be re-written as equation (7):

$$16 \quad r_N = -4.32 \ln \frac{R_{rc}(N)}{18.72}, (N = 1,2,3)$$

17 To describe the source location, we established three circle equations with sensors S1,  
 18 S2 and S3 as the center of the circles:

$$19 \quad x^2 + y^2 = r_1^2 \quad (S5)$$

$$20 \quad (x - L)^2 + y^2 = r_2^2 \quad (S6)$$

$$21 \quad \left(x - \frac{L}{2}\right)^2 + \left(y - \frac{\sqrt{3}}{2}L\right)^2 = r_3^2 \quad (S7)$$

1 Obviously, the coordinate of vibration source,  $V(x, y)$ , are the solutions to the equation  
2 (S5) to equation (S7), thus we can derive equation (6).

### 3 **Human-machine interfaces**

#### 4 *Neutral layer law*

5 During the bending process of the material, the outer layer is stretched and the inner  
6 layer is squeezed. There must be a transition layer on its section that is neither tensile  
7 nor compressive. The stress is almost zero. This transition layer is called the neutral  
8 layer of the material. The length of the neutral layer during bending is the same as that  
9 before bending, and remains unchanged. The neutral layer is the basis for calculating  
10 the developed length of bent parts.

11 As shown in the Supplementary Fig. S19, when the sample is bending, the length  
12 of the neutral layer remains unchanged. Where  $l$ ,  $l'$ ,  $h$ ,  $\theta$ ,  $R$  and  $\frac{1}{2}h$  are the length of  
13 sample with unloading, the length of sample with bending, the thickness of sample,  
14 bending angle, bending radius and the thickness of neutral layer.

$$15 \quad l' = 2\pi R * \frac{\theta}{360^\circ} \quad (S8)$$

$$16 \quad l = 2\pi \left( R - \frac{1}{2}h \right) * \frac{\theta}{360^\circ} \quad (S9)$$

$$17 \quad \Delta l = l' - l = h\pi * \frac{\theta}{360^\circ} \quad (S10)$$

18 According to the formula we deduce, the strain of sample with bending

19  $\Delta l = h\pi * \frac{\theta}{360^\circ}$ , which mean there is a linear relationship between bending angle and  
20 strain.

1        *Fabrication of electrical glove*

2        General medical rubber gloves were combined with sensor. Sensor fixed at the  
3 position corresponding to the second joint of the human finger, and the thumb at the  
4 only joint. Connect the silver-plated wire with both ends of the sensor through  
5 insulating tape and fix it on the rubber gloves.

6        *Signal acquisition*

7        Arduino platform was used to design the schematic diagram of signal acquisition  
8 and transmission circuit. Arduino is a convenient and powerful electronic prototype  
9 platform with functional output/input (I/O) pins, which can measure the resistance  
10 change of the sensor according to the schematic diagram. The sensor signal acquisition  
11 circuit were designed according to different experiments is shown in Fig. S16 and S17.  
12 For the resistance measurement of the sensor, the partial voltage resistance  
13 measurement method was adopted, that is a known resistance is connected in series on  
14 the sensor to be measured to give a known voltage to the circuit, and the voltage value  
15 at both ends of the sensor is measured through the (I/O) pin of Arduino chip. The  
16 resistance of the sensor is calculated by the partial voltage formula. If it is necessary to  
17 collect and save the sensing signal, the information can be transmitted to the computer  
18 through serial communication.

19        *Signal mapping and Bluetooth transmission*

20        In LED matrix control test, real-time resistance ( $R_{rt}$ ) was measured and calculated  
21 by Arduino platform (Fig. S16), and  $R_{rc}$  calculated by  $R_{rt}$  was divided in three regions.  
22 Each region corresponds to a LED matrix display combination of English letter. Under



1 the corresponding  $R_{rc}$  condition, the content display of LED is controlled by program.

2 In the Bluetooth car control experiment, the Arduino measurement channel were  
3 expanded to 4 and connected the Bluetooth module on Arduino. Each measurement  
4 channel corresponds to a separate sensor (Fig. S17 and S18). The  $R_{rt}$  of each sensor is  
5 measured separately and the corresponding  $R_{rc}$  is calculated. The  $R_{rc}$  corresponding to  
6 each sensor represents an action of the Bluetooth car, namely "Forward", "Backward",  
7 " Turn right" and " Turn left ". When the  $R_{rc}$  corresponding to the sensor exceeds the  
8 threshold set in the program, the Bluetooth module connected to Arduino transmits the  
9 corresponding instructions to the Bluetooth car, and the Bluetooth car takes  
10 corresponding actions after receiving the corresponding instructions. When the  
11 Bluetooth car receives different commands at the same time, for example, the "forward"  
12 and "backward" commands appear at the same time, its operation is carried out in the  
13 order of "Forward", "Backward", " Turn right" and " Turn left ".

#### 14 *Recognition of steady-state gestures*

15 In the steady-state gestures (SSGs) recognition experiment, the number of  
16 acquisition channels were increased to five which is the number of one hand, and  
17 collected ten different sets of gesture signal data, including the individual bending data  
18 of each finger and some simple gesture language. These gesture data well reflect the  
19 characteristics of gesture images, that is, bending fingers have high signal intensity. For  
20 the traditional classification model, it is difficult to effectively classify the gesture data,  
21 especially when there are multiple objects. In order to effectively and accurately  
22 classify and recognize these gesture data, we introduced a machine learning library

1 (Scikit-learn), which has various classification, regression and clustering algorithms for  
2 training gesture recognition<sup>3</sup>.

3 The whole SSGs recognition is divided into two parts: training and translation. In  
4 training section, SSGs data were collected by wearable devices. Before feeding SSGs  
5 data into Scikit-learn training, the signals must be processed. Pandas was used to input  
6 SSGs data as array which was merged into a set  $X$ . And then the set  $X$  was converted  
7  $x_i \in R^{40 \times 5}$  from 2-dimensional to 1-dimensional data  $x_i \in R^{800}$ . The set  $X$  was split to  
8 get the training set and test set. Using the LogisticsRegression API  
9 *LogisticRegression.fit(x,y)* to train the training set. Finally, the classification  
10 prediction model *LogisticRegression.predict(x)* was used to display the  
11 classification results and checked the accuracy rate to evaluate the model.

### 12 *Recognition of dynamic gestures*

13 The data of DGs recognition was collected continuously, we take 4 seconds as an  
14 action interval, which mean the subject only act one dynamic gesture in four seconds  
15 and doing nothing expect the gesture. In the experiment, we distinguish each gesture  
16 by adding a rest character to dataset. Rest character not only ensure that each group of  
17 gesture data has same data points which ensure the uniformity of data, but also giving  
18 the coordinates of the data time variable. In addition, the DGs set also show that even  
19 one subject doing the same gesture, the data of the five fingers intensity still have huge  
20 different and that's reason we use deep learning to train the model which can recognize  
21 the gesture by these data.

22 Significantly, a new variable time is introduced in DGs recognition. DGs data was

1 described as continuous data points on the time axis. Traditional mechanical learning  
2 models like Scikit-learn use K Nearest Neighbor (KNN) algorithm. In KNN algorithm  
3 if most of the k most similar samples in the feature space (that is, the closest samples  
4 in the feature space) belong to a certain category, the sample also belongs to this  
5 category<sup>4,5</sup>. The distance between two samples can be expressed by Euclidean distance,  
6 and the distance formula between point a ( $x_{11}, x_{12}, \dots, x_{1n}$ ) and point b ( $x_{21}, x_{22}, \dots, x_{2n}$ ) in  
7 N-dimensional space is as follows:

$$d_{12} = \sqrt{\sum_{k=1}^n (x_{1k} - x_{2k})^2} \quad (S11)$$

8  
9 KNN machine learning algorithm is mature in theory and simple in thought. It can be  
10 used for classification and regression as well as nonlinear classification. However, it is  
11 worth noting that the training time complexity of KNN is lower than that of support  
12 vector machine (SVM) algorithm which mean KNN can't handle time-related variables  
13 well. And when the number of features is very large, the calculation will increase.

14 To solve the defects of KNN algorithm, we introduced Vision Transformer (ViT)  
15 as the training model. Compared with KNN algorithm, ViT uses the self-attention  
16 mechanism to make the model parallel training and master the global information<sup>6-9</sup>. In  
17 ViT, Multi-Layer Perceptron (MLP) solves the flaw of traditional mechanical learning  
18 models. MLP splits the data in a data group into patches, and then uses linear projection  
19 to convert each patch into a vector, which maps the block into a vector space. These  
20 vectors are coupled with information about the location of patches in the dataset and  
21 submitted to the classic transformer. Finally, perform self-attention on the data and  
22 generate the results, and perform different downstream tasks according to the results.

1 Compared with KNN algorithm, ViT achieves excellent results with variable of time  
2 and requires less data for training.

3 In DGs recognition, the data of dynamic gesture combined with the GesViT to train  
4 which include MLP to cross validation. Ten dynamic gestures represent different  
5 meaning in sign language and these data with different intensity characteristics  
6 constitute the data set required for GesViT, which is used as training data for dynamic  
7 gesture recognition. Similar to SSGs recognition, DGs set was also split into training  
8 set and test set. After training with GesViT, the dynamic gesture recognition prediction  
9 model which was trained by deep learning shows high accuracy. The predicted results  
10 returned after MLP head training can be seen that the prediction results show high  
11 accuracy and relevance after training. F1-score of the model shows the high accuracy  
12 of dynamic gesture recognition after machine learning. F1-score is an evaluation index  
13 used for classification model in machine learning, including precision and recall which  
14 F1 score is their average value.

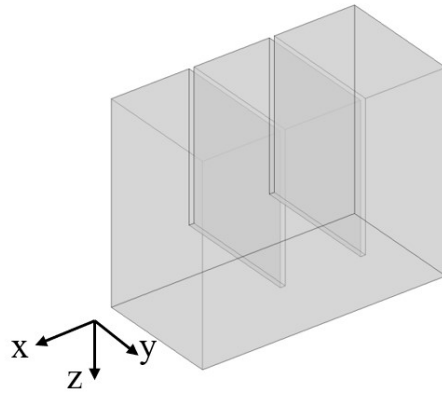

1

2 **Fig. S1** 3D model of crack structure for stress concentration effect.

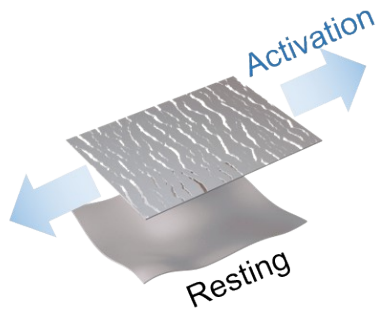

1

2 **Fig. S2** Schematic of biomimetic sensor with silver nanoparticle functional layer and a  
3 flexible polymer substrate.

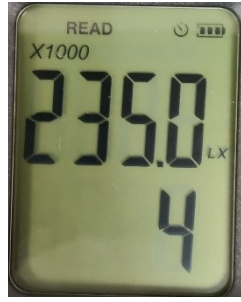

1

2 **Fig. S3** Luminous intensity of the UV source.

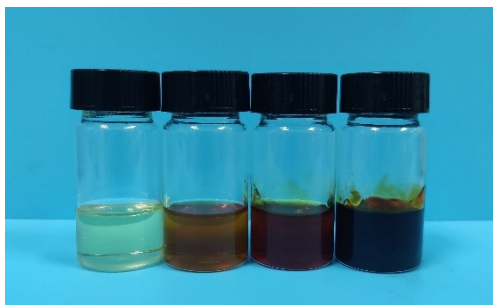

1

2 **Fig. S4** Optical image of precursor solutions which changed with time.



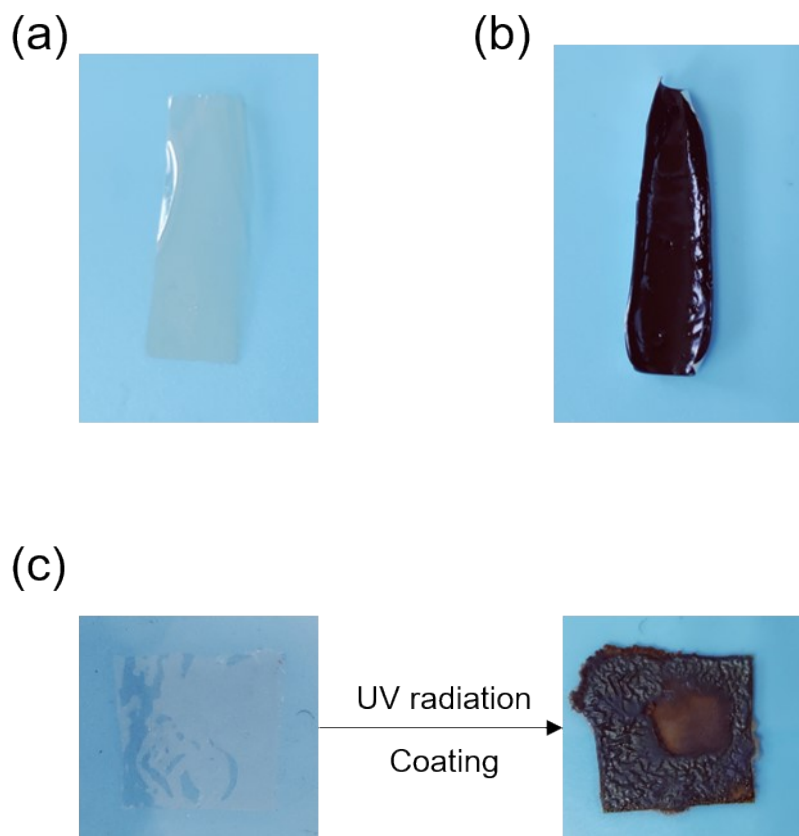

1

2 **Fig. S5** (a) Optical image of PAN film. (b) Optical image of PAN complexes. (c)

3 Optical image of PAN film after coating silver nitrate and UV radiation.

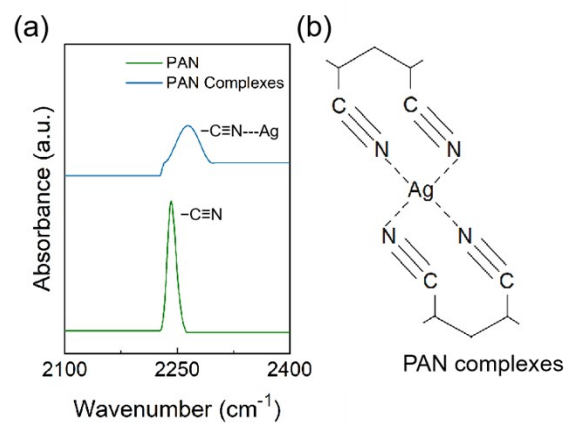

1

2 **Fig. S6** (a) FTIR spectra of PAN and PAN Complexes, showing different chemical

3 environments of nitrile groups. (b) the schematic for the primary molecular interactions

4 within PAN complexes network.

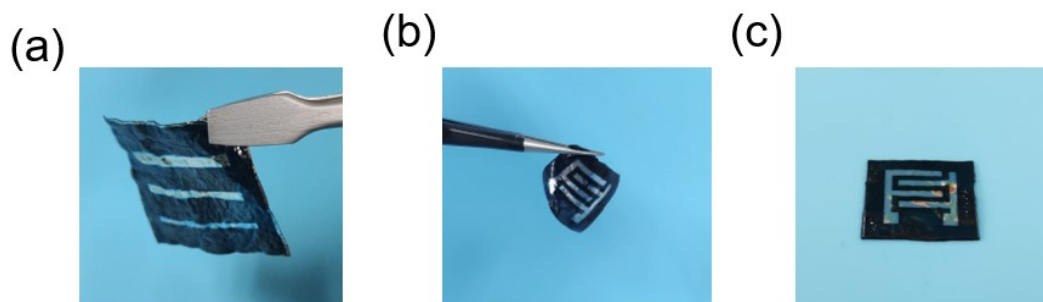

1

2 **Fig. S7** Optical image of SPBSS with different patterns. (a) Optical image of SPBSS  
3 with different line wires widths. (b) Optical image of SPBSS with interdigitated  
4 structure showing flexibility. (c) Overhead angle optical image of SPBSS with  
5 interdigitated structure.

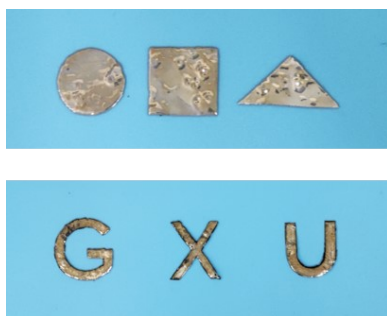

1

2 **Fig. S8** Optical image of as-prepared SPBSS which were cut into geometric figures

3 (“circular”, “square”, “triangle”) and letters (“G”, “X”, “U”).

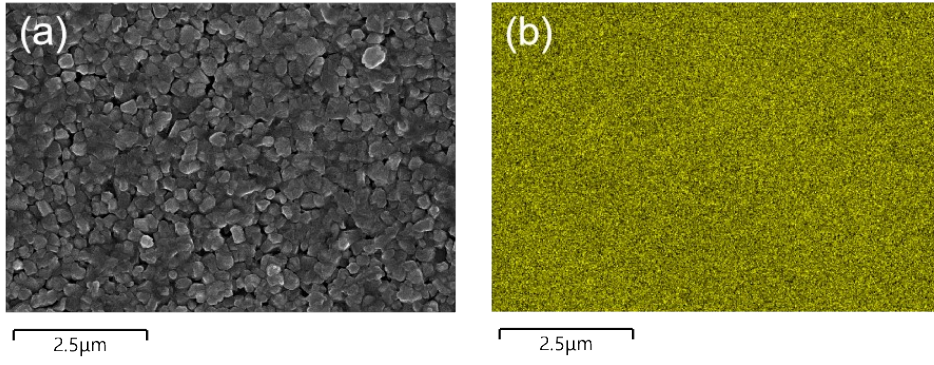

1

2 **Fig. S9** (a) SEM image of SPBSS with AgNPs on the surface, (b) and corresponding

3 element mapping of silver.

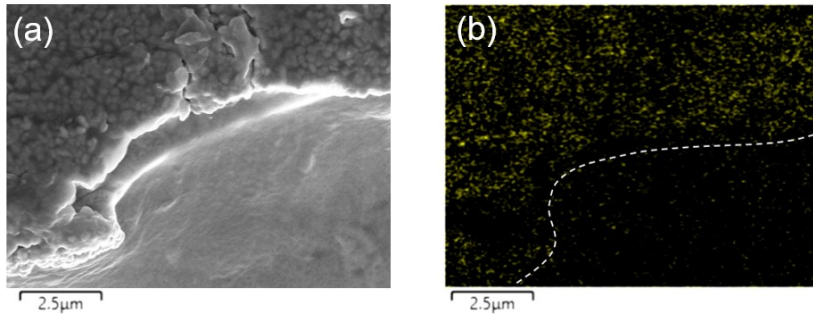

1

2 **Fig. S10** (a) Cross-section SEM image of SPBSS with double-layer structure consists

3 of a uniform electrical conductive AgNPs top layer, and corresponding elements

4 mapping of (b) silver.

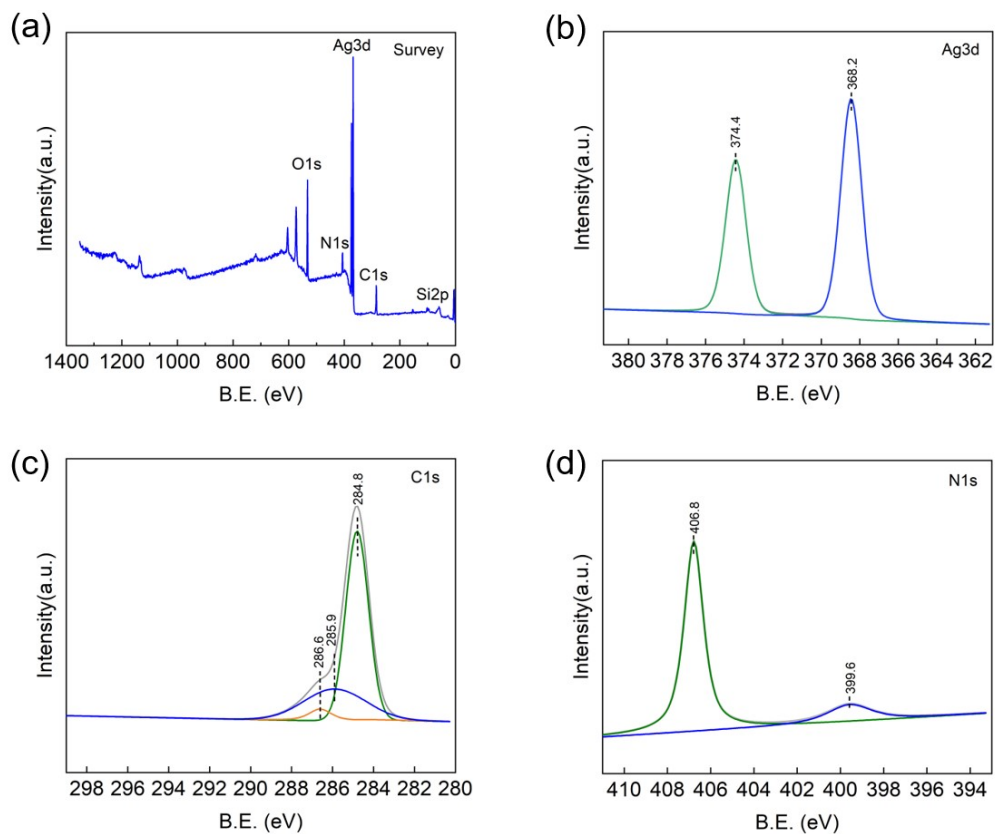

- 1 **Fig. S11** XPS spectrum of SPBSS. (a) XPS spectrum of SPBSS for all elements. (b)
- 2 High resolution XPS spectrum of SPBSS for Ag elements. (c) High resolution XPS
- 3 spectrum of SPBSS for C elements. (d) High resolution XPS spectrum of SPBSS for
- 4 N elements.

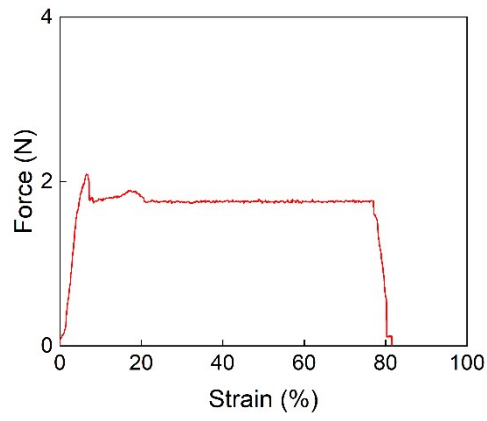

1

2 **Fig. S12** Force-strain curves of SPBSS was stretched until fracture.



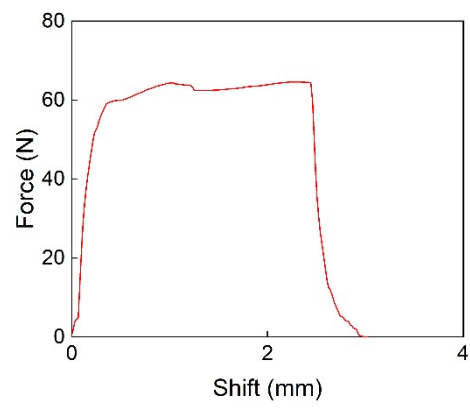

1

2 **Fig. S13** Force-Shift curves of SPBSS which AgNPs were stripped from PAN substrate

3 until fractures.

(a)

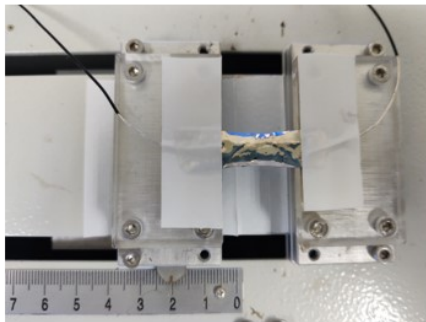

(b)

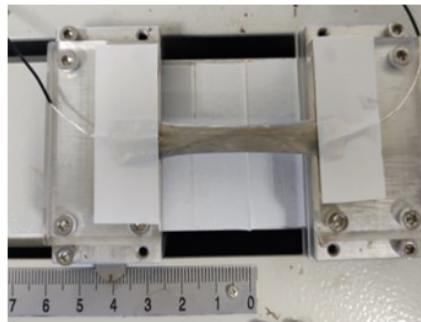

1

2 **Fig. S14** Optical image of SPBSS with different strained state. (a) Optical image of  
3 SPBSS with unstretched state. (b) Optical image of SPBSS with 100% strain state.

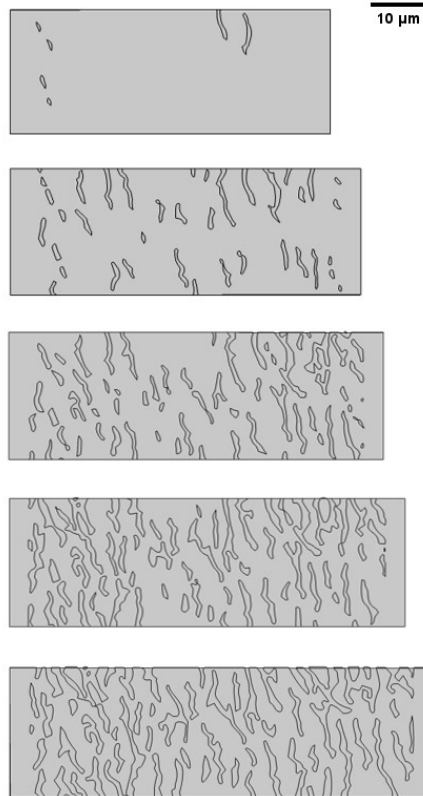

1

2 **Fig. S15** Schematic of SPBSS with microcrack structure under different strain of 0%,

3 4.5%, 9.0%, 13.6% and 18.2%.

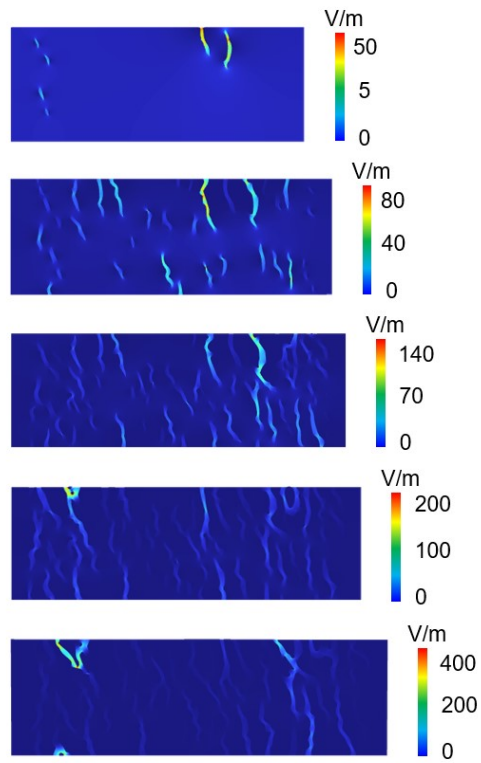

1

2 **Fig. S16** Potential distribution of the SPBSS under different strain of 0%, 4.5%, 9.0%,

3 13.6% and 18.2%.

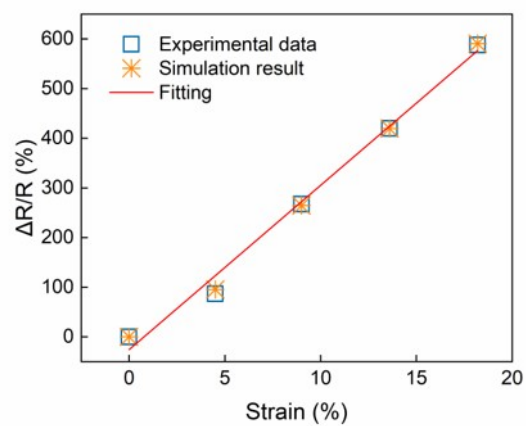

1

2 **Fig. S17**  $R_{rc}$ -strain curves of simulation results which fitting from experimental data

3 show good linearity.

4

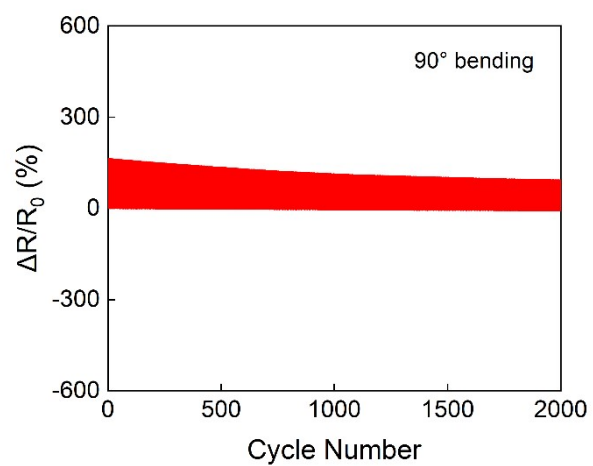

1

2 **Fig. S18** RCR-strain curves of SPBSS at 90 degrees for 2000 numbers of cycles.

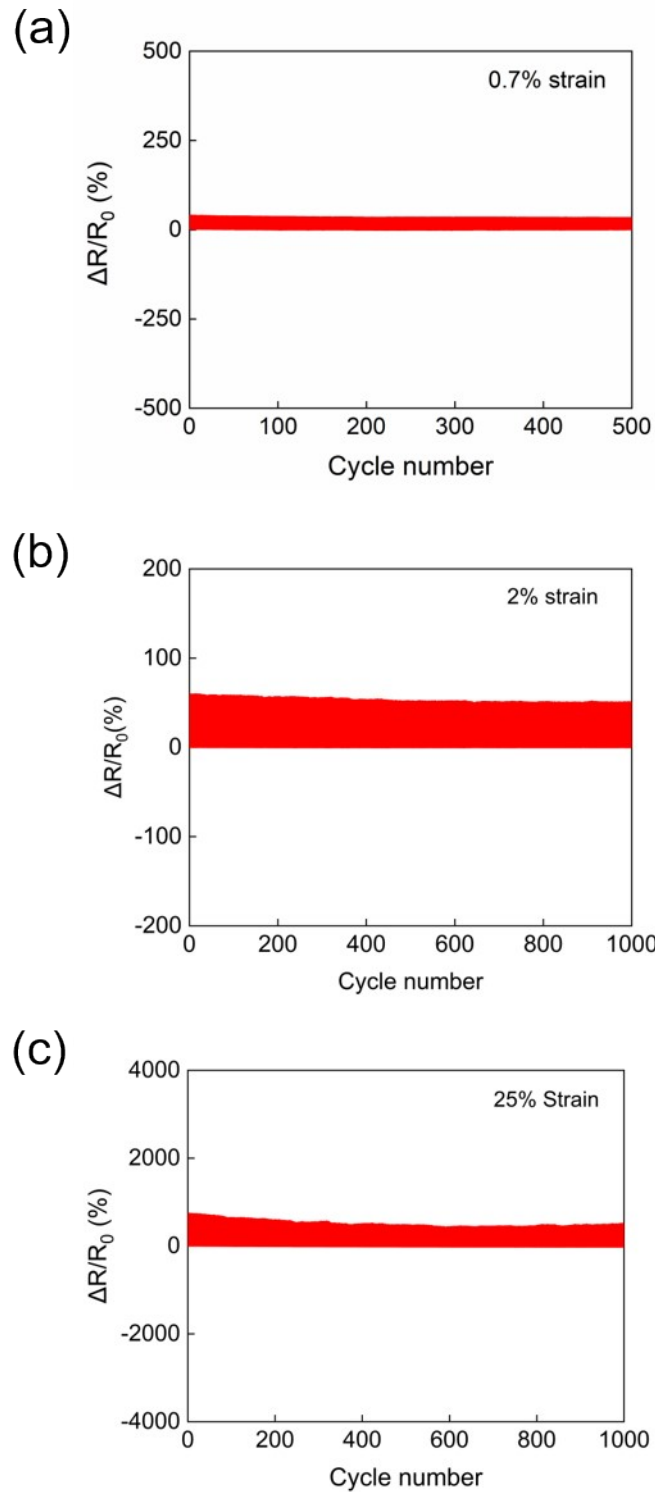

1

2 **Fig. S19** Mechanical fatigue test of SPBSS. (a) RCR-strain curves of SPBSS at 0.7%  
 3 strain for 500 numbers of cycles. (b) RCR-strain curves of SPBSS at 2% strain for 1000  
 4 numbers of cycles. (c) RCR-strain curves of SPBSS at 25% strain for 1000 numbers of  
 5 cycles.

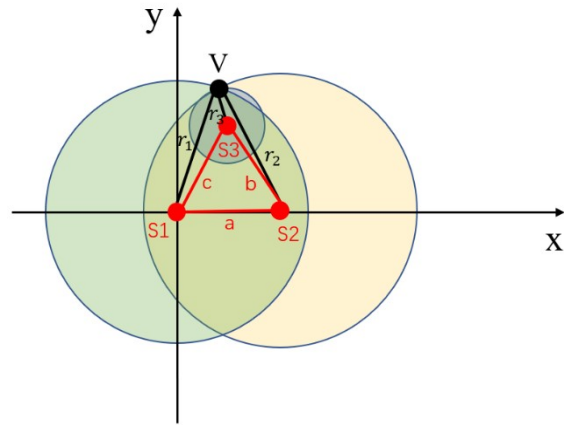

1

2 **Fig. S20** Schematic diagram of triangulation in cartesian coordinate system.



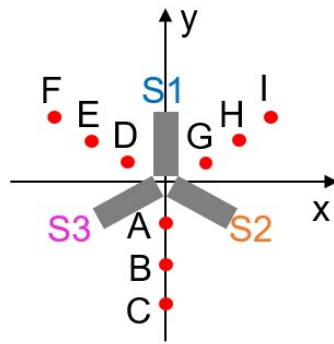

1

2 **Fig. S21** Rectangular coordinate system of vibration detection with position of  
3 vibration and SPBSS.

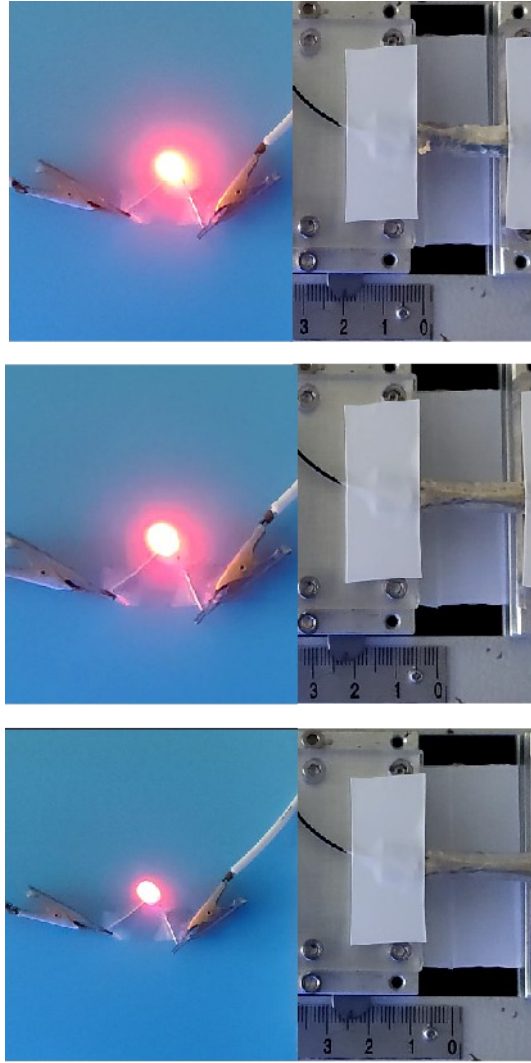

1

2 **Fig. S22** Optical image of LED connected series with SPBSS under 0%, 10%, and 25%  
3 strain.

(a)

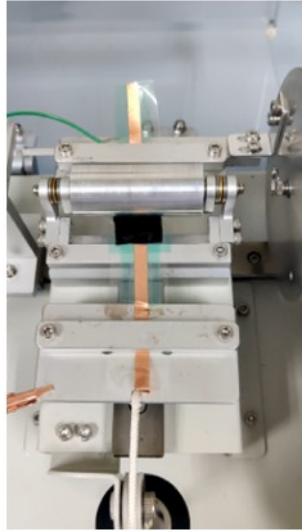

(b)

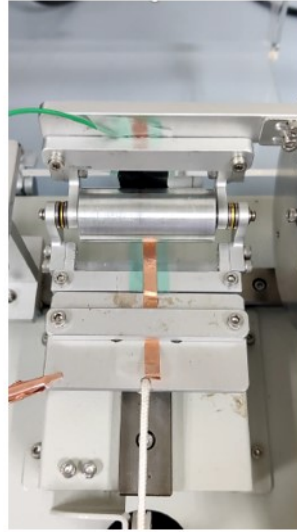

1

2 **Fig. S23** Optical image of SPBSS in bending test. (a) Optical image of SPBSS under  
3 unbending state. (b) Optical image of SPBSS under 90°bending.

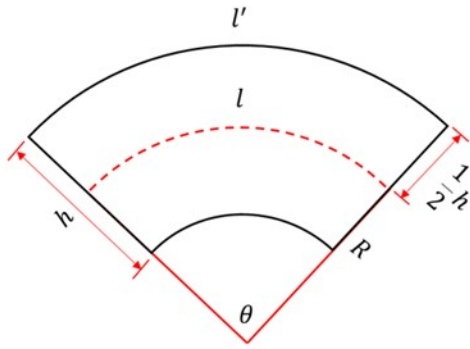

1

2 **Fig. S24** Schematic showing sample in bending state with neutral layer.

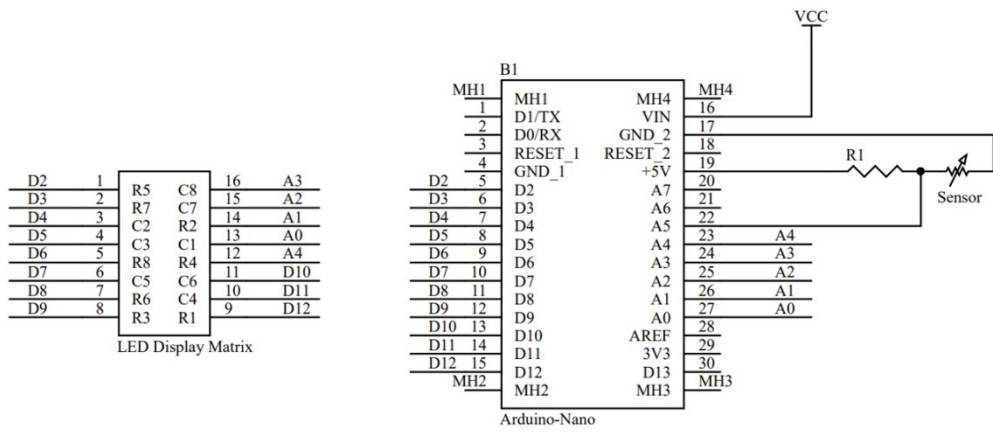

1

2 **Fig. S25** The circuit schematic diagram of Arduino-Nano with resistance measurement

3 and LED display matrix modular.

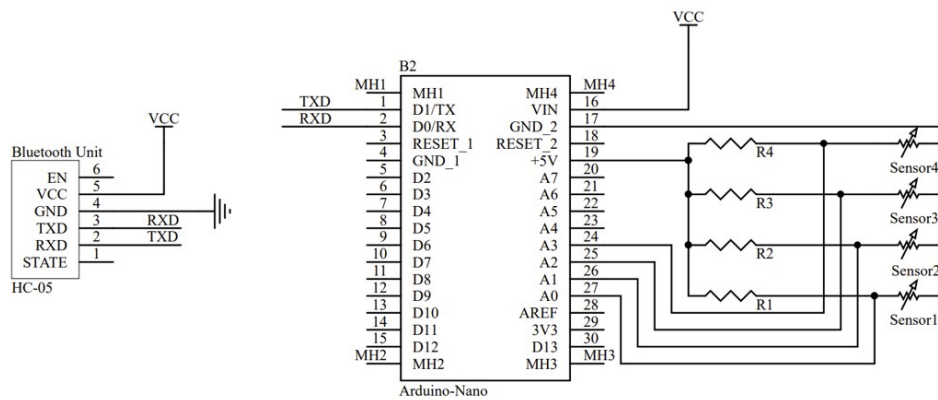

1

2 **Fig. S26** The circuit schematic diagram of Arduino-Nano with 4 channels resistance

3 measurement and Bluetooth module.

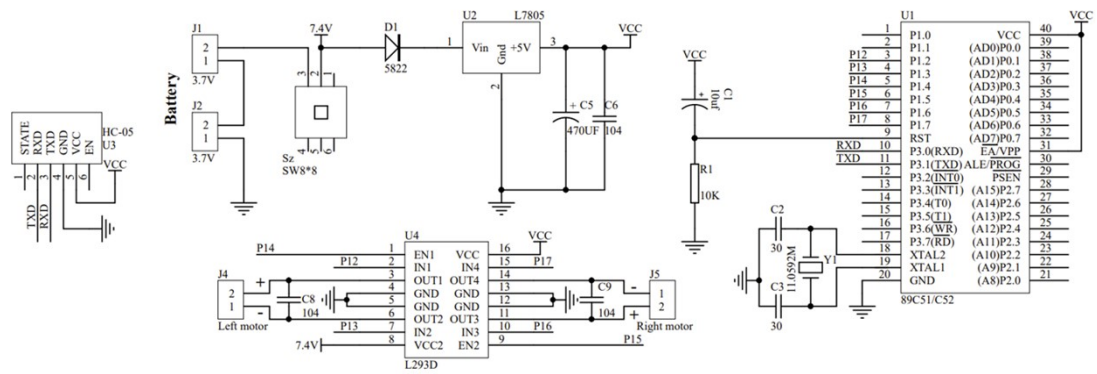

1

2 Fig. S27 The circuit schematic diagram of the mini Bluetooth car.

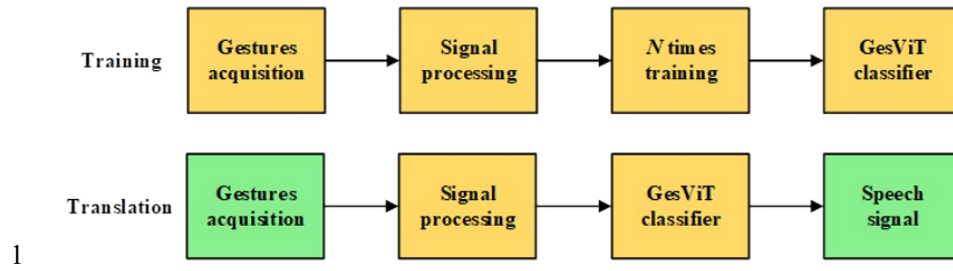

2 **Fig. S28** The flow-process diagram of ViT in training and translation.



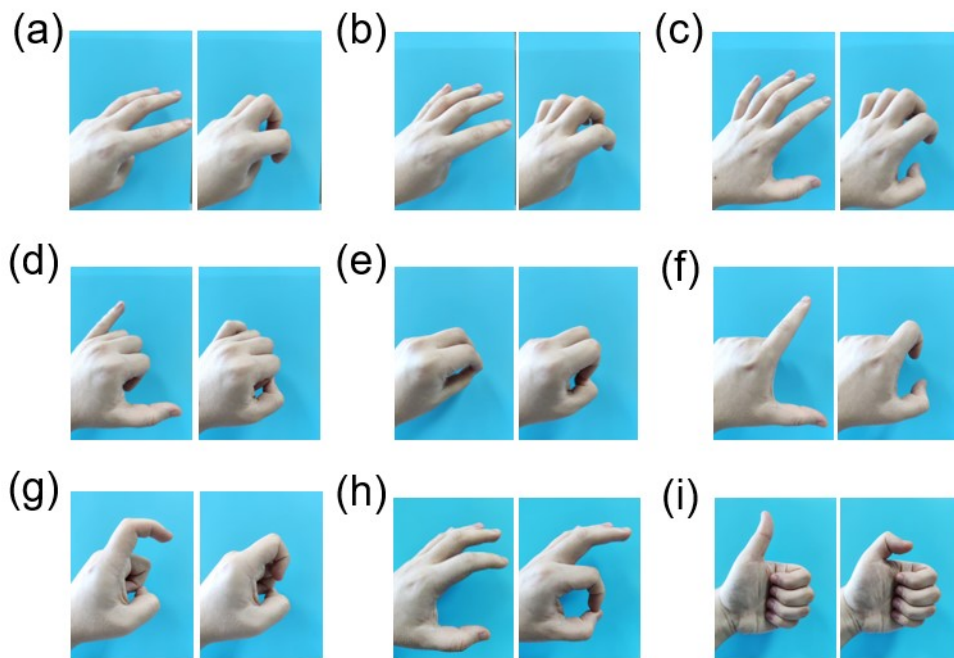

1

2 **Fig. S29** Optical images of dynamic gestures represent “30”, “40”, “50”, “60”, “70”,  
3 “80”, “90”, “Money”, “Thanks” separately.

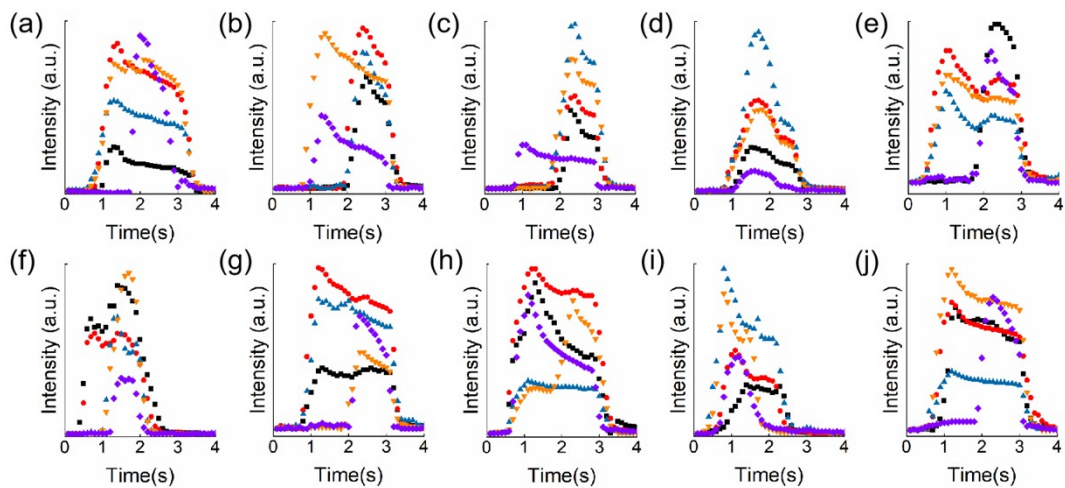

1

2 **Fig. S30** Intensity distribution of dynamic gestures in 4 seconds represent “30”, “40,”

3 “50”, “60”, “70”, “80”, “90”, “Money”, “Thanks” separately.

4

1 Table S1. Fabrication time of SPBSS and other strain sensors.

| Strain Sensor                    | Time of Fabrication | Time of Precursor Solution | Total Time          | References |
|----------------------------------|---------------------|----------------------------|---------------------|------------|
| This work                        | 5 min               | 3 hours                    | 3 hours and 5 min   | --         |
| PEDOT/Fabric                     | 3 hours and 30 min  | 30 min                     | 4 hours             | Ref.33     |
| Carbonized Crepe Paper/PDMS      | 10 hours and 20 min | --                         | 10 hours and 20min  | Ref.7      |
| CNT/Ni foam                      | 13 hours            | 2 hours                    | 15 hours            | Ref.38     |
| MWNTs/PDMS                       | 24 hours            | --                         | 24 hours            | Ref.40     |
| MXene/Cellulose Nanocrystal      | 14 hours and 40 min | 24 hours and 30 min        | 39 hours and 10 min | Ref.12     |
| Carbon Paper/PDMS                | 5 hours and 40 min  | --                         | 5 hours and 40 min  | Ref.41     |
| NR/ChNCs-CB composite            | 4 hours             | 6 hours and 20 min         | 10 hours and 20min  | Ref.16     |
| Carbon Black/PDMS                | 4 hours             | --                         | 4 hours             | Ref.6      |
| Ni foam/Graphene/PDMS            | 21 hours            | --                         | 21 hours            | Ref.42     |
| DN-FT-HCl hydrogel               | 18 hours            | 6 hours                    | 24 hours            | Ref.3      |
| Carbon Black/TPU                 | 5 hours and 30 min  | 4 hours                    | 9 hours and 30 min  | Ref.43     |
| Conductive Polymer Composites/PU | 10 hours and 20 min | 30 min                     | 10 hours and 50min  | Ref.22     |
| CNT/MXene/PDMS                   | 5 hours             | 2 hours                    | 7 hours             | Ref.26     |

1 **Supplementary Video S1.** A SPBSS controlled LED matrix for controllable content  
2 display.

3 **Supplementary Video S2.** Basic driving commands (forward, backward, turn right,  
4 and turn left) of a mini Bluetooth car controlled by SPBSS electronic gloves.

5 **Supplementary Video S3.** Continuous obstacle avoidance of the mini Bluetooth car  
6 controlled by SPBSS electronic gloves.

7

## 8 **Supplementary References**

9 1 V. K. J. J. o. E. S. Kaushik and R. Phenomena, *J. Electron Spectros. Relat.*  
10 *Phenomena*, 1991, **56**, 273-277.

11 2 C. R. Wu, W. R. Salaneck, J. J. Ritsko and J. L. Bredas, *Synth. Met.*, 1986, **16**,  
12 147-159.

13 3 F. Pedregosa, G. Varoquaux, A. Gramfort, V. Michel, B. Thirion, O. Grisel, M.  
14 Blondel, P. Prettenhofer, R. Weiss and V. J. t. J. o. m. L. r. Dubourg, 2011, **12**,  
15 2825-2830.

16 4 S. Zhang, X. Li, M. Zong, X. Zhu and D. Cheng, *ACM Transactions on*  
17 *Intelligent Systems and Technology*, 2017, **8**, 1-19.

18 5 G. Guo, H. Wang, D. Bell, Y. Bi and K. Greer, Berlin, Heidelberg, 2003.

19 6 A. Dosovitskiy, L. Beyer, A. Kolesnikov, D. Weissenborn, X. Zhai, T.  
20 Unterthiner, M. Dehghani, M. Minderer, G. Heigold and S. J. a. p. a. Gelly,  
21 *arXiv preprint arXiv:2010.11929.*, 2020, 11929.

22 7 A. Steiner, A. Kolesnikov, X. Zhai, R. Wightman, J. Uszkoreit and L. J. a. p. a.

1 Beyer, *arXiv preprint arXiv:2106.10270*, 2021, 10270.

2 8 I. O. Tolstikhin, N. Houlsby, A. Kolesnikov, L. Beyer, X. Zhai, T. Unterthiner,  
3 J. Yung, A. Steiner, D. Keysers and J. J. A. i. n. i. p. s. Uszkoreit, *Advances in*  
4 *neural information processing systems*, 2021, **34**, 24261-24272.

5 9 A. Vaswani, N. Shazeer, N. Parmar, J. Uszkoreit, L. Jones, A. N. Gomez, Ł.  
6 Kaiser and I. J. A. i. n. i. p. s. Polosukhin, *Advances in neural information*  
7 *processing systems*, 2017, **30**, 30.

8
